# Supplementary material for: CRISPR/Cas9-generated mouse model of Duchenne muscular dystrophy recapitulating a newly identified large 430 kb deletion in the human DMD gene
Source: Oxford University Press journal article supplement (doi:10.1242/dmm.037655), 2019-04-01
Supplement: dmm037655supp.pdf [file dmm037655supp.pdf]

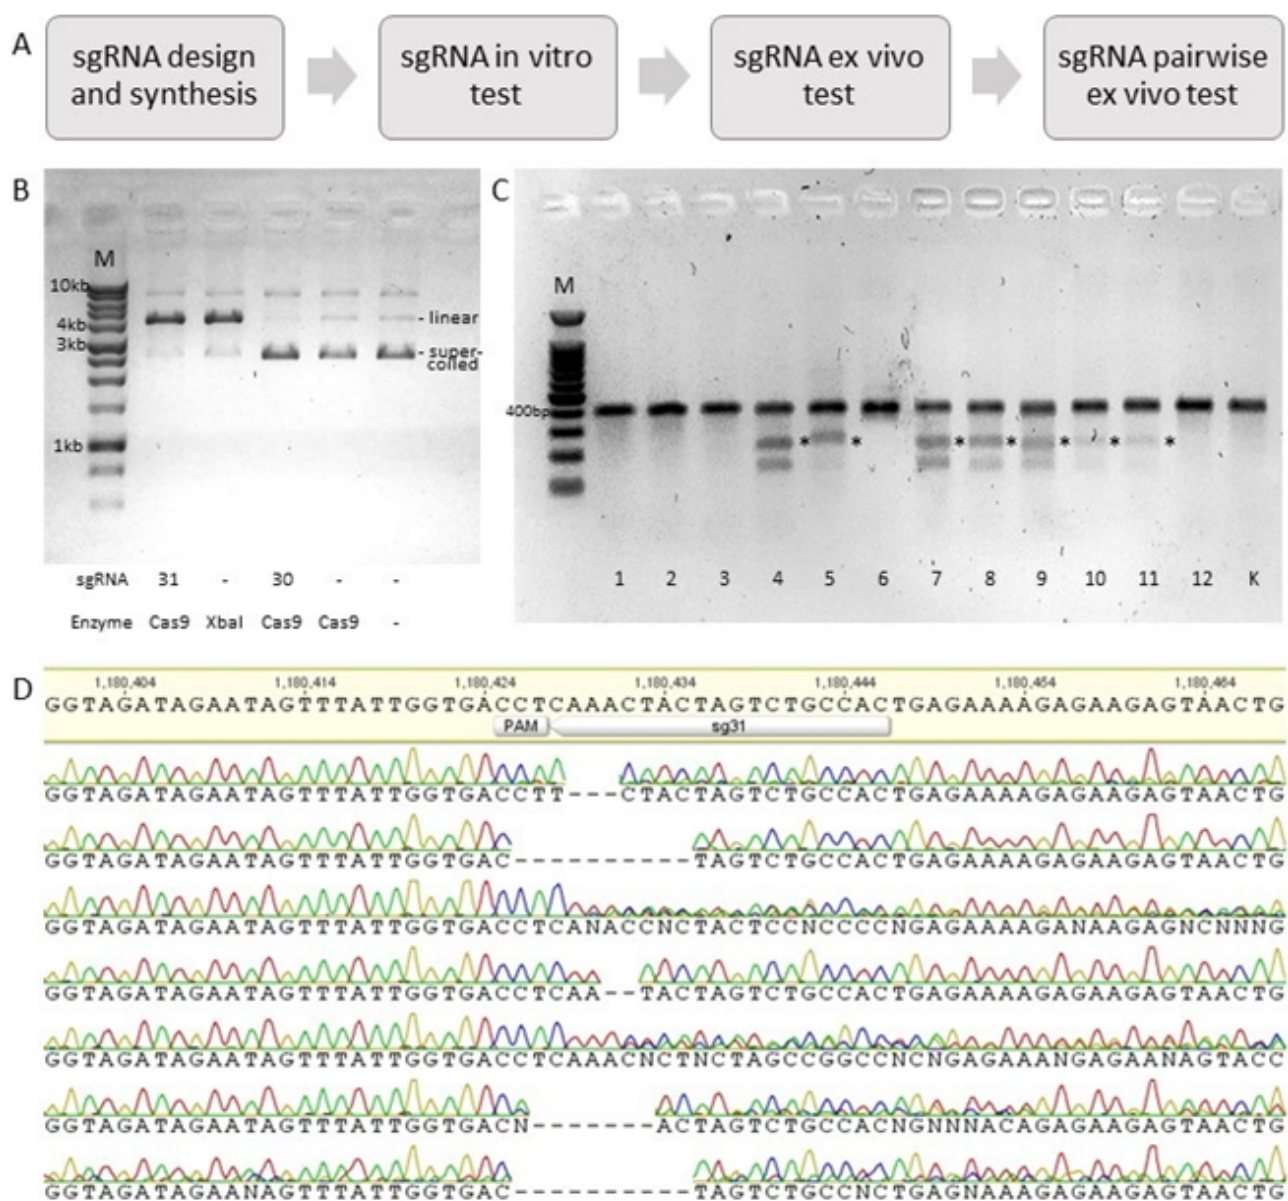

**Figure S1. Guide RNA tests.** A flowthrough of guide RNA testing is shown in panel A. The following test examples are for sg31. B. The cleavage capability of synthetic sgRNAs was assessed on a recombinant plasmid containing a PCR-amplified target fragment of the mouse *dmd* gene (plasmid length 4170 bp). This plasmid contained a single site for the XbaI restriction endonuclease, and digestion of the plasmid with this enzyme was used as a control for the efficiency of sgRNA-driven cleavage. At the same time, the selected plasmid could not be cleaved with the complex containing a nonspecific guide (sgRNA 30) or in the absence of sgRNA or both sgRNA and Cas9 protein. M-1 kb plus DNA ladder (NL001, Evrogen). C. The effectiveness of individual sgRNA was also tested on blastocysts; after direct injection of a

complex containing sgRNA and Cas9 mRNA, embryos were left in a CO<sub>2</sub> incubator before reaching the blastocyst stage. Then, the target region was amplified, and cleavage effectiveness was examined in the T7EI test. T7EI cleaves single-strand DNA, which is a result of partial complementarity of PCR products amplified from injected and noninjected embryos. Cleaved fragments are marked with asterisks and correspond to samples successfully modified by the Cas9-sg31 complex. M-100 bp plus DNA ladder (NL002, Evrogen). Direct Sanger sequencing of PCR products (D) confirmed the specificity of cleavage (products are mapped to the murine dystrophin gene).

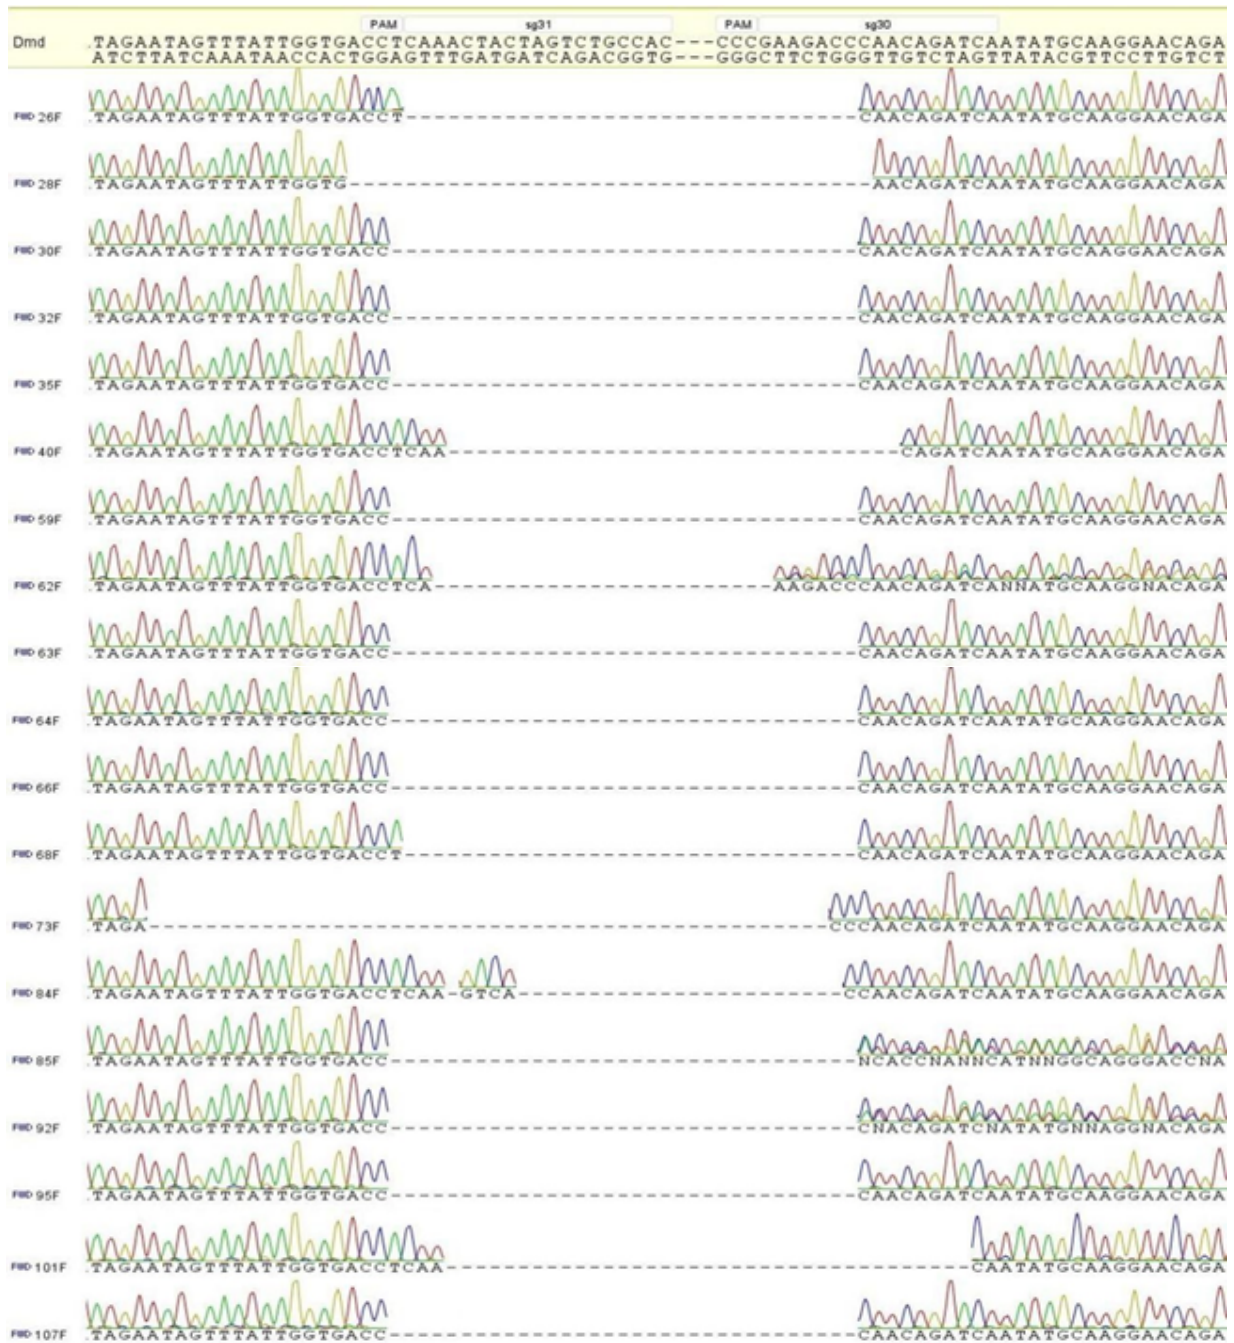

**Figure S2. Sanger sequencing results of deletion borders in the *dmd* gene of mutant mice.**

**Table S1. Primers used for target site amplification for *in vitro* tests and deletion detection after blastocyst microinjections and mouse genotyping.**

| Target name | Forward primer, 5'-3'     | Reverse primer, 5'-3'      | Product size, bp |
|-------------|---------------------------|----------------------------|------------------|
| Lb          | GCGTTTCATTCACTTTCTGGATGTG | AGTCACTTTAGGTGGCCTTGG      | 857              |
| Rb          | GCCAAGAGTTGCCTGAGAGGAAC   | TGACAGTGAATAGTGACTCCAATGGC | 813              |
| sg30        | ACTATTGTGGAACACAGCATACA   | GAGAGAAAAGAGGCAGACTGTAG    | 607              |
| sg31        | TCAAACAAAAGGCAGAAGAGTAAG  | GGTCCAAAGTAGGCCTCGTA       | 434              |
| sg32        | AGGCACATATAGTCAAGTTCAGTCA | TGCCATTCTGATCCTATTTCATTTCC | 730              |
| sg33        | GTTCTACTCTAAAACATCAGAGGCT | ACACATAGGACACATTCATGCAG    | 477              |
| sg34        | CAGTGCCCCACACACATACA      | AGCAAAAGTTATTTTAGGGCATACT  | 505              |
| sg35        | CAGAGGTACTGGCATTGGAAC     | AAGTGGTATCCCCTTCTGCC       | 432              |
| Tet         | TTGTTCTCTCCTCTGACTGC      | TGATTGATCAAATAGGCCTGC      | 460              |
| Grid2       | TCATATTATGGAGACCCCAACCA   | GTGGCCAAGCAACTCCTTTT       | 360              |
| Skint5      | AAAGGGGACACCTGCTTCTG      | GCCTACCTGGCTGTTTCAAGG      | 344              |
| Sugp2       | GAGCCATCTAAACGGCTGTC      | GCTCCATGACAGGTAGGACT       | 573              |
| Tff3        | TGCAGAGGTTTGAAGCACCA      | CCTGATGGCCAAGGGATGTT       | 406              |
| Unc5c       | GGGACTGGGTGTTTTTGCCT      | TCTCTGCCTCACTGTCACCT       | 386              |
| Fmn2        | GGGCTCGTAGGGGTTCTTTAG     | GGCTAATGGGTACATGGTCTC      | 265              |
